# Supplementary material for: Genome-wide identification and functional characterization of the Camelina sativa WRKY gene family in response to abiotic stress
Source: BMC Genomics. 2020 Nov 11;21:786. doi: 10.1186/s12864-020-07189-3 (PMC7659147; doi:10.1186/s12864-020-07189-3)
Supplement: Supplementary file 2 — Additional file 2 : Table S2. Detailed information of all identified Camelina sativa WRKY proteins. [file 12864_2020_7189_MOESM2_ESM.xlsx]

## Sheet: Sheet1
Additional file 2: Table S2. Detailed information of all identified Camelina sativa WRKY proteins.
New Name	Protein	mRNA	gene ID	Chr.	Group	Start	End	SL	MW(Da)	PI
CsWRKY1	XP_010458864.1	XM_010460562.2	Csa14g016930	14	1	6652740	6655780	518	56410.6	8.31
CsWRKY2	XP_010458865.1	XM_010460563.2	Csa14g016930	14	1	6652740	6655780	518	56410.6	8.31
CsWRKY3	XP_010458866.1	XM_010460564.2	Csa14g016930	14	1	6652740	6655780	518	56410.6	8.31
CsWRKY4	XP_010476427.1	XM_010478125.2	Csa17g019340	17	1	6422240	6425358	525	56734	8.31
CsWRKY5	XP_010495680.1	XM_010497378.2	Csa03g017700	3	1	6359139	6361970	524	56751	7.98
CsWRKY6	XP_010502347.1	XM_010504045.1	Csa04g008890	4	1	3166177	3169653	515	56267.9	8.04
CsWRKY7	XP_019102162.1	XM_019246617.1	Csa06g004330	6	1	1860659	1863845	508	55592.2	8.04
CsWRKY8	XP_010507611.1	XM_010509309.1	Csa04g052260	4	1	24812406	24814456	468	51849.8	8.54
CsWRKY9	XP_010517143.1	XM_010518841.2	Csa06g041320	6	1	20888272	20890566	516	57202.5	7.66
CsWRKY10	XP_010509125.1	XM_010510823.2	Csa05g014650	5	1	5134456	5136875	512	56759	7.64
CsWRKY11	XP_010514101.1	XM_010515799.2	Csa06g004330	6	1	1860659	1863845	515	56472.2	8.05
CsWRKY12	XP_010448237.1	XM_010449935.2	Csa12g025230	12	1	7552387	7555070	488	54059.7	7.43
CsWRKY13	XP_010425121.1	XM_010426819.2	Csa09g005670	9	1	2321404	2323810	517	56513	7.76
CsWRKY14	XP_010432103.1	XM_010433801.2	Csa01g001480	1	1	208081	210458	463	50471.6	8.85
CsWRKY15	XP_019096865.1	XM_019241320.1	Csa19g002570	19	1	275534	277764	464	50478.5	7.75
CsWRKY16	XP_010448235.1	XM_010449933.2	Csa12g025230	12	1	7551345	7555070	563	61765.2	7.86
CsWRKY17	XP_010467049.1	XM_010468747.2	Csa15g057050	15	1	18885538	18888469	467	51935.3	6.8
CsWRKY18	XP_010467050.1	XM_010468748.2	Csa15g057050	15	1	18885975	18888469	467	51935.3	6.8
CsWRKY19	XP_010412444.1	XM_010414142.1	Csa01g036700	1	1	18624010	18626858	472	52517.8	6.73
CsWRKY20	XP_010488735.1	XM_010490433.2	Csa19g040120	19	1	16484228	16487204	472	52396.7	6.9
CsWRKY21	XP_010516987.1	XM_010518685.2	Csa06g039950	6	1	20259272	20261775	428	47031.8	9.74
CsWRKY22	XP_010516986.1	XM_010518684.2	Csa06g039950	6	1	20259281	20261775	430	47273.1	9.74
CsWRKY23	XP_010505305.1	XM_010507003.2	Csa04g050830	4	1	24043368	24045856	426	46668.4	9.38
CsWRKY24	XP_010505304.1	XM_010507002.2	Csa04g050830	4	1	24043368	24045856	428	46909.7	9.38
CsWRKY25	XP_019087112.1	XM_019231567.1	Csa11g017960	11	1	8014817	8017482	517	56408.1	5.9
CsWRKY26	XP_010438720.1	XM_010440418.2	Csa11g017590	11	1	7834492	7837858	489	53995.6	7.43
CsWRKY27	XP_010438721.1	XM_010440419.2	Csa11g017590	11	1	7834491	7837858	489	53995.6	7.43
CsWRKY28	XP_019086219.1	XM_019230674.1	Csa10g016490	10	1	6869861	6871676	513	56038.8	6.16
CsWRKY29	XP_010449897.1	XM_010451595.2	Csa02g058180	2	1	21863034	21865921	554	61452	7.2
CsWRKY30	XP_010483009.1	XM_010484707.2	Csa18g027090	18	1	14267679	14270853	552	61315	7
CsWRKY31	XP_010509359.1	XM_010511057.2	Csa05g016590	5	1	6253830	6256283	431	47289	9.7
CsWRKY32	XP_010509360.1	XM_010511058.2	Csa05g016590	5	1	6253830	6256287	431	47289	9.7
CsWRKY33	XP_019101272.1	XM_019245727.1	Csa05g016590	5	1	6253830	6256283	431	47289	9.7
CsWRKY34	XP_019088951.1	XM_019233406.1	Csa12g025570	12	1	7734886	7736944	513	56099.7	6.17
CsWRKY35	XP_019086402.1	XM_019230857.1	Csa10g016180	10	1	6741302	6743549	384	42949.6	7.03
CsWRKY36	XP_010438718.1	XM_010440416.2	Csa11g017590	11	1	7833421	7837858	564	61753.1	7.86
CsWRKY37	XP_010438719.1	XM_010440417.2	Csa11g017590	11	1	7833420	7837858	564	61753.1	7.86
CsWRKY38	XP_010433466.1	XM_010435164.2	Csa10g016180	10	1	6740860	6743460	491	54503.2	7.28
CsWRKY39	XP_019087085.1	XM_019231540.1	Csa11g088800	11	1	43019627	43022659	521	58111.8	7.43
CsWRKY40	XP_010452660.1	XM_010454358.2	Csa13g009120	13	1	2807923	2809619	313	35143.3	9.77
CsWRKY41	XP_010433465.1	XM_010435163.2	Csa10g016180	10	1	6739814	6743460	563	61946.4	7.65
CsWRKY42	XP_010483100.1	XM_010484798.1	Csa18g028960	18	1	14695903	14699334	700	75886.4	6.24
CsWRKY43	XP_010491310.1	XM_010493008.2	Csa20g009470	20	1	2918592	2920257	313	35182.2	9.84
CsWRKY44	XP_010450884.1	XM_010452582.1	Csa02g059180	2	1	22446893	22450278	703	76011.4	6.07
CsWRKY45	XP_010443277.1	XM_010444975.2	Csa11g089590	11	1	43476396	43479761	699	75565	6.19
CsWRKY46	XP_019092681.1	XM_019237136.1	Csa15g001510	15	1	200580	202990	470	51161.2	8.01
CsWRKY47	XP_019084085.1	XM_019228540.1	Csa02g015920	8	1	18869205	18878067	1699	190700	6.43
CsWRKY48	XP_010469879.1	XM_010471577.1	Csa16g014640	16	1	5345246	5347385	392	44157.5	7.01
CsWRKY49	XP_010510388.1	XM_010512086.2	Csa05g033500	5	1	12158143	12160276	392	44065.4	7.01
CsWRKY50	XP_010414287.1	XM_010415985.2	Csa07g012930	7	1	5975096	5977303	392	44058.4	7.58
CsWRKY51	XP_010432924.1	XM_010434622.2	Csa10g011590	10	1	4656053	4658577	479	52671.3	6.67
CsWRKY52	XP_010447641.1	XM_010449339.1	Csa12g016180	12	1	4905348	4907859	477	52487.1	5.59
CsWRKY53	XP_010438103.1	XM_010439801.2	Csa11g012430	11	1	5227526	5229906	475	52145.8	6.06
CsWRKY54	XP_010452661.1	XM_010454359.2	Csa13g009120	13	1	2807923	2809427	271	30342.9	9.68
CsWRKY55	XP_010491311.1	XM_010493009.2	Csa20g009470	20	1	2918591	2920257	276	30934.3	9.8
CsWRKY56	XP_010460705.1	XM_010462403.2	Csa14g036840	14	2e	14816604	14818081	263	29683.8	4.94
CsWRKY57	XP_010460704.1	XM_010462402.2	Csa14g036840	14	2e	14816604	14818081	264	29770.9	4.94
CsWRKY58	XP_010499444.1	XM_010501142.1	Csa03g032440	3	2e	13645665	13647155	265	29970.1	5.16
CsWRKY59	XP_010478290.1	XM_010479988.1	Csa17g042050	17	2e	14940273	14942900	265	29869	5.15
CsWRKY60	XP_010419873.1	XM_010421571.1	Csa08g004940	8	2c	1565502	1566901	150	17483.5	9.83
CsWRKY61	XP_010442827.1	XM_010444525.2	Csa11g084600	11	2e	40943409	40944847	361	39991.7	4.68
CsWRKY62	XP_010445280.1	XM_010446978.2	Csa02g049050	2	2e	17522068	17523547	364	40099.9	4.84
CsWRKY63	XP_010482660.1	XM_010484358.2	Csa18g023770	18	2e	12375403	12376937	366	40440.2	4.59
CsWRKY64	XP_010478361.1	XM_010480059.1	Csa17g042800	17	2c	15586421	15587919	287	32606.2	8.14
CsWRKY65	XP_010439894.1	XM_010441592.2	Csa11g030400	11	2c	13903488	13905132	323	35882.9	6.79
CsWRKY66	XP_010453363.1	XM_010455061.1	Csa13g015660	13	2c	5408920	5410255	151	17538.5	9.62
CsWRKY67	XP_010460763.1	XM_010462461.1	Csa14g037440	14	2c	15226985	15228510	287	32497.1	8.33
CsWRKY68	XP_010434566.1	XM_010436264.2	Csa10g027050	10	2c	11481072	11482716	324	35875.8	6.86
CsWRKY69	XP_010449496.1	XM_010451194.2	Csa12g044210	12	2c	14460199	14462052	321	35698.8	6.79
CsWRKY70	XP_010492050.1	XM_010493748.2	Csa20g018420	20	2c	5732003	5733337	149	17239.2	9.58
CsWRKY71	XP_010440671.1	XM_010442369.2	Csa02g035670	2	2c	13443057	13445747	410	45938.8	7.21
CsWRKY72	XP_010482227.1	XM_010483925.2	Csa18g018890	18	2c	9438016	9440631	411	46115.8	6.77
CsWRKY73	XP_010499502.1	XM_010501200.1	Csa03g033040	3	2c	13985705	13987231	288	32658.4	7.78
CsWRKY74	XP_010516644.1	XM_010518342.2	Csa06g037310	6	2e	18923386	18924864	225	25028.7	5.12
CsWRKY75	XP_010506761.1	XM_010508459.2	Csa04g066410	4	2c	29763983	29765699	342	38254.8	6.84
CsWRKY76	XP_010442419.1	XM_010444117.1	Csa11g078830	11	2c	37956452	37959069	414	46649.4	7.05
CsWRKY77	XP_010470908.1	XM_010472606.2	Csa16g030620	16	2c	16228104	16231644	282	31437.2	6.84
CsWRKY78	XP_010470909.1	XM_010472607.2	Csa16g030620	16	2c	16227786	16231644	282	31437.2	6.84
CsWRKY79	XP_010470911.1	XM_010472609.2	Csa16g030620	16	2c	16227786	16231644	282	31437.2	6.84
CsWRKY80	XP_010470912.1	XM_010472610.2	Csa16g030620	16	2c	16228472	16231644	282	31437.2	6.84
CsWRKY81	XP_019093150.1	XM_019237605.1	Csa16g030620	16	2c	16228104	16231644	282	31437.2	6.84
CsWRKY82	XP_019093151.1	XM_019237606.1	Csa16g030620	16	2c	16228104	16231644	282	31437.2	6.84
CsWRKY83	XP_010447511.1	XM_010449209.2	Csa12g014300	12	2d	4471976	4473599	322	35389.9	10.31
CsWRKY84	XP_010447510.1	XM_010449208.2	Csa12g014300	12	2d	4471976	4473599	323	35477	10.31
CsWRKY85	XP_010432849.1	XM_010434547.2	Csa10g010980	10	2d	4388668	4390324	331	36309.1	10.23
CsWRKY86	XP_010432848.1	XM_010434546.2	Csa10g010980	10	2d	4388667	4390324	332	36396.1	10.23
CsWRKY87	XP_010438024.1	XM_010439722.2	Csa11g011840	11	2d	4924742	4926370	332	36394.1	10.24
CsWRKY88	XP_010511955.1	XM_010513653.2	Csa05g086010	5	2c	30948191	30951781	281	31263	6.57
CsWRKY89	XP_010438023.1	XM_010439721.2	Csa11g011840	11	2d	4924742	4926370	333	36481.2	10.24
CsWRKY90	XP_010415567.1	XM_010417265.2	Csa07g035970	7	2c	19376413	19380027	281	31363	6.63
CsWRKY91	XP_010429281.1	XM_010430979.2	Csa09g087610	9	2d	33074982	33076468	308	33471.4	10.26
CsWRKY92	XP_010472333.1	XM_010474031.2	Csa16g045060	16	2d	23100572	23102005	309	33580.5	10.26
CsWRKY93	XP_010417085.1	XM_010418783.2	Csa07g053360	7	2d	27250389	27251860	310	33587.5	10.26
CsWRKY94	XP_010441322.1	XM_010443020.1	Csa11g060110	11	2c	28651101	28652306	178	20873.5	8.32
CsWRKY95	XP_010433890.1	XM_010435588.1	Csa10g019620	10	2e	8371104	8372767	308	34217.8	5.75
CsWRKY96	XP_010439158.1	XM_010440856.2	Csa11g022360	11	2e	9840096	9841756	308	34220.8	5.75
CsWRKY97	XP_010418439.1	XM_010420137.2	Csa07g065480	7	2c	33269695	33270874	193	21461.9	7.54
CsWRKY98	XP_010473645.1	XM_010475343.1	Csa16g056700	16	2c	28713781	28714777	193	21548	8.23
CsWRKY99	XP_010430513.1	XM_010432211.2	Csa09g098810	9	2c	37704597	37705850	193	21533.9	7.94
CsWRKY100	XP_010508813.2	XM_010510511.2	Csa05g011970	5	3	3772335	3774420	313	35259.7	8.36
CsWRKY101	XP_010505825.2	XM_010507523.2	Csa04g055090	4	3	26243369	26245658	312	35204.5	8.46
CsWRKY102	XP_010447642.1	XM_010449340.2	Csa02g054950	2	2c	19971759	19972943	179	20830.3	8.78
CsWRKY103	XP_010509700.1	XM_010511398.2	Csa05g020390	5	2e	7800608	7803755	437	47375.4	4.78
CsWRKY104	XP_010436107.1	XM_019231341.1	Csa10g050090	10	2c	24537855	24538585	180	20922.5	8.32
CsWRKY105	XP_010510329.1	XM_010512027.2	Csa05g032070	5	2d	11825241	11827301	382	43269.6	10.47
CsWRKY106	XP_010469830.1	XM_010471528.2	Csa16g014270	16	2d	5111654	5113696	383	43362.7	10.43
CsWRKY107	XP_010414241.1	XM_010415939.2	Csa07g012500	7	2d	5675571	5677609	386	43733.1	10.47
CsWRKY108	XP_010422786.1	XM_010424484.2	Csa08g053600	8	2e	22918924	22920689	303	32583.7	7.57
CsWRKY109	XP_010456229.1	XM_010457927.1	Csa13g056480	13	2e	23468563	23470233	303	32601.8	7.91
CsWRKY110	XP_010427624.1	XM_010429322.2	Csa02g002030	2	2e	599344	601099	304	32753.9	7.92
CsWRKY111	XP_010517511.2	XM_010519209.2	Csa06g045170	6	3	22247782	22250016	311	34995.4	8.2
CsWRKY112	XP_010518421.1	XM_010520119.1	Csa06g053800	6	2c	26025735	26027622	356	39991.9	7.15
CsWRKY113	XP_010439133.1	XM_010440831.1	Csa11g021070	11	3	9612943	9614462	316	35462.5	6.52
CsWRKY114	XP_010448655.1	XM_010450353.1	Csa12g030620	12	3	9412546	9414021	313	35054.9	6.06
CsWRKY115	XP_010499609.1	XM_010501307.2	Csa03g033900	3	2e	14629973	14633152	434	46980.3	5.4
CsWRKY116	XP_010460874.1	XM_010462572.1	Csa14g038430	14	2e	16044774	16047809	433	46860.1	5.11
CsWRKY117	XP_010478495.1	XM_010480193.2	Csa17g046010	17	2e	16912952	16915856	434	46974.2	5.24
CsWRKY118	XP_010504968.1	XM_010506666.1	Csa04g047110	4	2e	22642807	22646250	433	46796.8	4.92
CsWRKY119	XP_010433860.1	XM_010435558.1	Csa10g019250	10	3	8194114	8195633	318	35436.5	6.68
CsWRKY120	XP_010417213.1	XM_010418911.1	Csa07g054560	7	2d	27997894	27999778	329	35994.7	10.36
CsWRKY121	XP_010472466.1	XM_010474164.2	Csa16g046230	16	2d	23772545	23774331	329	35921.6	10.28
CsWRKY122	XP_010429439.1	XM_010431137.2	Csa09g088740	9	2d	33695371	33697215	333	36330	10.21
CsWRKY123	XP_010417626.1	XM_010419324.2	Csa01g005410	1	2d	1461365	1463432	334	36888.7	9.59
CsWRKY124	XP_010485848.1	XM_010487546.2	Csa19g006840	19	2d	1648723	1650782	335	37120.9	9.77
CsWRKY125	XP_010463951.1	XM_010465649.2	Csa15g005640	15	2d	1506609	1511148	338	37330.2	9.74
CsWRKY126	XP_010468009.2	XM_010469707.2	Csa15g005640	15	2d	1506609	1511148	338	37330.2	9.74
CsWRKY127	XP_010454964.1	XM_010456662.2	Csa13g034180	13	2c	13390962	13392566	173	19416.3	5.34
CsWRKY128	XP_010421489.1	XM_010423187.2	Csa08g023990	8	2c	11017708	11020372	173	19294.1	5.34
CsWRKY129	XP_010448687.1	XM_010450385.2	Csa12g031870	12	2e	9640155	9641708	343	38607	7.36
CsWRKY130	XP_010481461.1	XM_010483159.2	Csa18g003680	18	2c	1781856	1784229	327	37347	8.07
CsWRKY131	XP_010494803.1	XM_010496501.1	Csa20g079490	20	2c	28141632	28143892	327	37246.8	7.74
CsWRKY132	XP_019097259.1	XM_019241714.1	Csa20g079490	20	2c	28140641	28143896	327	37246.8	7.74
CsWRKY133	XP_019097260.1	XM_019241715.1	Csa20g079490	20	2c	28138865	28143903	327	37246.8	7.74
CsWRKY134	XP_010441593.1	XM_010443291.1	Csa11g065620	11	2c	30801023	30803431	328	37462.2	8.39
CsWRKY135	XP_010493874.1	XM_010495572.2	Csa20g051550	20	2c	17836022	17837637	173	19306.1	5.35
CsWRKY136	XP_010442347.1	XM_010444045.1	Csa11g077160	11	2c	37380259	37381108	136	15981.1	9.6
CsWRKY137	XP_019101229.1	XM_019245684.1	Csa05g011960	5	3	3768794	3770555	332	37250.1	6.18
CsWRKY138	XP_010433796.1	XM_010435494.1	Csa10g018800	10	2d	7959103	7961273	360	39127.6	9.89
CsWRKY139	XP_010448589.1	XM_010450287.2	Csa12g030150	12	2d	9122200	9124066	360	39354.9	10.06
CsWRKY140	XP_010431912.1	XM_010433610.2	Csa10g002200	10	2c	591925	595189	302	34124.2	8.12
CsWRKY141	XP_010437064.1	XM_010438762.2	Csa11g002440	11	2c	689031	691929	303	34236.2	8.13
CsWRKY142	XP_010505827.1	XM_010507525.2	Csa04g055100	4	3	26247304	26249322	332	37089.8	5.77
CsWRKY143	XP_010446487.1	XM_010507525.2	Csa04g055100	4	2c	26247304	26249322	302	33997	8.38
CsWRKY144	XP_010507912.1	XM_010509610.2	Csa05g001910	5	2c	412052	413853	350	39016.7	6.75
CsWRKY145	XP_010517514.1	XM_010519212.2	Csa06g045180	6	3	22251567	22253566	331	36867.7	5.96
CsWRKY146	XP_019083236.1	XM_019227691.1	Csa07g033540	7	2b	17954415	17956650	351	39813	5.52
CsWRKY147	XP_010439068.1	XM_010440766.2	Csa11g020520	11	2d	9297128	9299375	359	39138.8	10.29
CsWRKY148	XP_010439878.1	XM_010441576.2	Csa02g034860	2	2c	12796492	12797404	149	17240.3	9.41
CsWRKY149	XP_010482175.1	XM_010483873.2	Csa18g016240	18	2c	8681869	8682989	149	17230.3	9.63
CsWRKY150	XP_010518079.1	XM_010519777.2	Csa06g051110	6	2c	24631212	24633182	219	24721.1	8.97
CsWRKY151	XP_010506408.1	XM_010508106.2	Csa04g062610	4	2c	28327449	28329423	221	24905.3	8.97
CsWRKY152	XP_010508256.1	XM_010509954.2	Csa05g005510	5	2c	1712904	1714816	222	24976.4	8.97
CsWRKY153	XP_010516246.1	XM_010517944.1	Csa06g031130	6	3	17348690	17350133	301	33805.4	6.61
CsWRKY154	XP_010516247.1	XM_010517945.2	Csa06g031130	6	3	17348690	17350726	301	33805.4	6.61
CsWRKY155	XP_019101610.1	XM_019246065.1	Csa05g083160	5	2b	29256337	29258134	354	40000.2	6.15
CsWRKY156	XP_010454702.1	XM_010456400.1	Csa13g028610	13	3	11067546	11069243	306	34548.7	6.72
CsWRKY157	XP_010504547.1	XM_010506245.1	Csa04g042830	4	3	20957802	20961162	299	33530.1	6.4
CsWRKY158	XP_010422045.1	XM_010423743.1	Csa08g043210	8	3	17813592	17815068	313	35183.1	6.42
CsWRKY159	XP_010455506.1	XM_010457204.1	Csa13g048200	13	3	18780239	18781636	313	35426.3	6.42
CsWRKY160	XP_010435570.1	XM_010437268.1	Csa02g021680	2	3	7219404	7220993	320	35807.7	6.58
CsWRKY161	XP_010421221.1	XM_010422919.2	Csa08g018430	8	3	8383902	8385745	306	34257.4	6.72
CsWRKY162	XP_010473445.1	XM_010475143.2	Csa16g055030	16	2b	27772298	27774823	570	62357.3	6.01
CsWRKY163	XP_010430271.1	XM_010431969.2	Csa09g096910	9	2b	36792074	36794713	571	62482.5	5.88
CsWRKY164	XP_010418216.1	XM_010419914.2	Csa07g063560	7	2b	32287468	32290150	569	62329.4	6.31
CsWRKY165	XP_019093573.1	XM_019238028.1	Csa16g028000	16	2b	14924106	14925953	352	40006.3	5.89
CsWRKY166	XP_010442042.1	XM_010443740.2	Csa11g071610	11	2c	34547372	34548775	318	36301.5	6.9
CsWRKY167	XP_010516530.1	XM_010518228.2	Csa06g035480	6	2e	18503812	18505761	275	30681.4	4.89
CsWRKY168	XP_010516529.1	XM_010518227.2	Csa06g035480	6	2e	18503816	18505761	276	30768.4	4.89
CsWRKY169	XP_010427779.1	XM_010429477.2	Csa09g071340	9	2e	27423010	27425015	277	30828.4	4.76
CsWRKY170	XP_010420167.1	XM_010421865.2	Csa08g007210	8	2b	2651294	2653902	541	58340.8	6.78
CsWRKY171	XP_010492337.1	XM_010494035.1	Csa20g021610	20	2b	6837739	6840375	541	58303.8	6.98
CsWRKY172	XP_010504831.1	XM_010506529.2	Csa04g046240	4	2e	22189921	22191928	277	30782.3	4.71
CsWRKY173	XP_010504830.1	XM_010506528.2	Csa04g046240	4	2e	22189923	22191928	278	30869.4	4.71
CsWRKY174	XP_010453641.1	XM_010455339.2	Csa13g017960	13	2b	6473168	6475786	546	58865.6	7.21
CsWRKY175	XP_010456128.1	XM_010457826.1	Csa13g055590	13	2b	22921954	22925391	490	53818.7	6.08
CsWRKY176	XP_010428690.1	XM_010430388.2	Csa02g004840	2	2b	1116760	1120317	490	53889	6.12
CsWRKY177	XP_010422693.1	XM_010424391.2	Csa08g052800	8	2b	22353238	22357127	488	53607.7	6.41
CsWRKY178	XP_010422691.1	XM_010424389.2	Csa08g052800	8	2b	22353238	22359388	529	58245.3	6.9
CsWRKY179	XP_010496182.1	XM_010497880.2	Csa00511s240	Unknow	2b	152160	155198	531	58412.3	6.95
CsWRKY180	XP_010432828.1	XM_010434526.1	Csa02g012740	2	2b	3896612	3899843	533	58496.2	6.83
CsWRKY181	XP_010455724.1	XM_010457422.2	Csa13g052170	13	2b	20660656	20663650	531	58186.1	7.06
CsWRKY182	XP_010468965.1	XM_010470663.1	Csa16g002300	16	2c	641602	642856	282	32192.5	7.11
CsWRKY183	XP_010512623.1	XM_010514321.2	Csa05g094560	5	2c	34277174	34278534	291	33329.5	6.36
CsWRKY184	XP_010494309.1	XM_010496007.2	Csa20g067200	20	2c	22975010	22976293	317	36212.1	6.95
CsWRKY185	XP_010429489.1	XM_010431187.2	Csa09g090160	9	2a	33923213	33924937	269	30222.9	9.09
CsWRKY186	XP_010481619.1	XM_010483317.1	Csa18g008090	18	2d	3062376	3067469	1312	148510	6.14
CsWRKY187	XP_010427459.1	XM_010429157.1	Csa09g068700	9	3	25962620	25964197	304	34080.7	6.55
CsWRKY188	XP_010448943.1	XM_010450641.2	Csa12g034930	12	2b	11349580	11354097	540	59137.1	5.68
CsWRKY189	XP_010434087.1	XM_010435785.2	Csa10g021170	10	2b	9262038	9271504	540	59040	6.11
CsWRKY190	XP_010439371.1	XM_010441069.2	Csa11g024150	11	2b	10976946	10980228	540	59142.2	5.84
CsWRKY191	XP_019089580.1	XM_019234035.1	Csa12g034930	12	2b	11349580	11354097	561	61534.6	5.42
CsWRKY192	XP_010432815.1	XM_010434513.2	Csa10g010720	10	2a	4226524	4228494	307	34671.5	8.34
CsWRKY193	XP_010447543.1	XM_010449241.1	Csa12g014570	12	2a	4612410	4614368	306	34545.2	7.4
CsWRKY194	XP_010493548.1	XM_010495246.2	Csa20g039360	20	3	14292524	14294218	306	34512.7	6.71
CsWRKY195	XP_010417256.1	XM_010418954.2	Csa07g055020	7	2a	28275083	28277228	269	30361.1	8.82
CsWRKY196	XP_010437991.1	XM_010439689.2	Csa11g011520	11	2a	4751700	4753654	307	34552.3	8.33
CsWRKY197	XP_010477088.1	XM_010478786.1	Csa17g024690	17	2b	8741054	8743850	539	59605.3	7.27
CsWRKY198	XP_010459533.1	XM_010461231.2	Csa14g024230	14	2b	9072077	9074935	540	59584.4	7.37
CsWRKY199	XP_010472507.1	XM_010474205.2	Csa16g046620	16	2a	23979604	23981327	269	30289	8.88
CsWRKY200	XP_010498293.1	XM_010499991.1	Csa03g022750	3	2b	8558146	8560963	542	59695.2	7.2
CsWRKY201	XP_010516245.1	XM_010517943.1	Csa06g031120	6	3	17344374	17346075	262	29684.3	5.59
CsWRKY202	XP_010418567.1	XM_010420265.1	Csa07g002290	7	2c	616874	617989	284	32366.6	6.68
CsWRKY203	XP_019094606.1	XM_019239061.1	Csa14g067480	17	2c	33767542	33770426	467	52060.5	4.45
CsWRKY204	XP_019096699.1	XM_019241154.1	Csa03g062230	3	2c	28036035	28038404	479	53396.2	4.13
CsWRKY205	XP_010481875.1	XM_010483573.2	Csa18g010550	18	2c	5537635	5539314	315	36078.1	6.51
CsWRKY206	XP_010490495.1	XM_010492193.1	Csa20g001100	20	3	56695	57806	265	30566.2	6.58
CsWRKY207	XP_010424008.1	XM_010425706.1	Csa08g063550	8	3	27670039	27671167	272	31298	6.54
CsWRKY208	XP_019085601.1	XM_019230056.1	Csa09g068690	9	3	25957653	25959793	246	28081.7	5.55
CsWRKY209	XP_010512040.1	XM_010513738.2	Csa05g087690	5	2b	31485614	31487894	380	42545.8	6.67
CsWRKY210	XP_010413369.1	XM_010415067.2	Csa07g002990	7	3	1031388	1033337	321	37235.9	8.54
CsWRKY211	XP_010429892.1	XM_010431590.1	Csa09g094090	9	2a	35533994	35535765	303	33737.5	8.42
CsWRKY212	XP_010429891.1	XM_010431589.2	Csa09g094090	9	2a	35533994	35535766	304	33865.7	8.42
CsWRKY213	XP_010472865.1	XM_010474563.2	Csa16g049540	16	2a	25489261	25491099	303	33796.6	8.16
CsWRKY214	XP_019093443.1	XM_019237898.1	Csa16g049540	16	2a	25489261	25491100	304	33924.7	8.16
CsWRKY215	XP_010415644.1	XM_010417342.2	Csa07g036580	7	2b	19898124	19900527	384	42679.8	6.92
CsWRKY216	XP_010508028.1	XM_010509726.2	Csa05g002800	5	3	860092	861475	301	34447.7	8.31
CsWRKY217	XP_010518312.1	XM_010520010.1	Csa06g052890	6	3	25551199	25552611	296	33855.7	6.27
CsWRKY218	XP_010506641.1	XM_010508339.2	Csa04g065450	4	3	29273343	29274717	300	34116.1	6.52
CsWRKY219	XP_010470983.1	XM_010472681.2	Csa16g031370	16	2b	16739693	16741991	384	42787.9	6.89
CsWRKY220	XP_010494612.1	XM_010496310.1	Csa11g068440	20	2d	26459040	26465460	1442	163300	6.15
CsWRKY221	XP_010417656.1	XM_010419354.2	Csa07g058980	7	2a	29903352	29905119	303	33747.6	8.16
CsWRKY222	XP_019083557.1	XM_019228012.1	Csa07g058980	7	2a	29903352	29905119	304	33875.7	8.16
CsWRKY223	XP_010429107.1	XM_010430805.2	Csa09g086250	9	2c	32337746	32339961	199	22989.1	5.98
CsWRKY224	XP_010451923.1	XM_010453621.1	Csa13g001010	13	3	5333	6495	272	31351	6.42
CsWRKY225	XP_010511490.1	XM_010513188.1	Csa05g072260	5	3	25682963	25684110	239	27238.2	5.76
CsWRKY226	XP_010504543.1	XM_010506241.2	Csa04g042820	4	3	20954094	20955710	217	25340.8	9.48
CsWRKY227	XP_010470533.1	XM_010472231.2	Csa16g024190	16	3	13096361	13097564	243	27641.8	5.72
CsWRKY228	XP_010462706.1	XM_010464404.2	Csa02g073920	2	2c	27776856	27778424	193	21972.8	5.31
CsWRKY229	XP_010462714.1	XM_010464412.1	Csa02g073920	2	2c	27776591	27778424	193	21972.8	5.31
CsWRKY230	XP_010484276.1	XM_010485974.2	Csa18g038500	18	2c	19375075	19376794	192	21854.8	5.33
CsWRKY231	XP_010512528.1	XM_010514226.2	Csa05g093770	5	3	33894178	33895474	310	35711.2	8.82
CsWRKY232	XP_010444429.1	XM_010446127.2	Csa11g101950	11	2c	48157886	48159561	195	22244.3	5.33
CsWRKY233	XP_010416945.1	XM_010418643.1	Csa07g052010	7	2c	26439756	26441948	199	23067.2	6.17
CsWRKY234	XP_010469114.1	XM_010470812.2	Csa16g003780	16	3	1431962	1433262	311	36047.7	9.59
CsWRKY235	XP_010472190.1	XM_010473888.2	Csa16g043660	16	2c	22312981	22315132	199	23021.1	6.34
CsWRKY236	XP_010454525.1	XM_010456223.2	Csa13g026130	13	3	10092604	10094191	291	33246.3	5.71
CsWRKY237	XP_010493351.1	XM_010495049.1	Csa20g036310	20	3	12388049	12389698	292	33371.4	5.89
CsWRKY238	XP_010421053.1	XM_010422751.2	Csa08g015860	8	3	6957664	6959212	291	33319.3	6.04
CsWRKY239	XP_010418616.1	XM_010420314.2	Csa07g004560	7	3	1822001	1823009	254	29336.7	8.27
CsWRKY240	XP_019086886.1	XM_019231341.1	Csa10g050090	10	2c	24537855	24538585	148	16953	8.71
CsWRKY241	XP_010447650.1	XM_010449348.2	Csa02g054950	2	2c	19971759	19972561	147	16918.9	9.06
CsWRKY242	XP_010423253.1	XM_010424951.2	Csa08g057340	8	1	24563834	24565101	214	23513.9	7.82
