# Supplementary material for: Genome-wide identification and functional characterization of the Camelina sativa WRKY gene family in response to abiotic stress
Source: BMC Genomics. 2020 Nov 11;21:786. doi: 10.1186/s12864-020-07189-3 (PMC7659147; doi:10.1186/s12864-020-07189-3)
Supplement: Supplementary file 5 — Additional file 5 : Table S5. Tandem duplication and segmental duplication of some species. [file 12864_2020_7189_MOESM5_ESM.xlsx]

## Sheet: Sheet1
Additional file 5: Table S5. Tandem Duplication and segmental duplication of some specises.
Species	Tandem Duplication	Segment Duplication	Refs
Pineapple	7	17	[27]
Chickpea	1	21	[50]
Arabidopsis thaliana	0	6	[61]
Chinese Cabbage	1	72	[18]
Arachis hypogaea L (Peanut)	4	10	[59]
Triticum aestivum L. (wheat)	5	80	[60]
Glycine max (soybean)	18	102	[61]
Camelina sativa	0	137	This study
Brassica napus	7	12	[46]
