# Supplementary material for: Genome-wide identification and functional characterization of the Camelina sativa WRKY gene family in response to abiotic stress
Source: BMC Genomics. 2020 Nov 11;21:786. doi: 10.1186/s12864-020-07189-3 (PMC7659147; doi:10.1186/s12864-020-07189-3)
Supplement: Supplementary file 7 — Additional file 7 : Table S7. Primer pairs used for qRT-PCR analysis on the target sequences in C. sativa. [file 12864_2020_7189_MOESM7_ESM.xlsx]

## Sheet: sheet1
Additional file 7: Table S7. Primer pairs used for qRT-PCR analysis on the target sequences in C. sativa
CsWRKY	Primer pairs
	Forward primer (5'-3')	Reverse primer (5'-3')
CsWRKY21	TGTCTCATTCCTTTTCATGAGC	TGGATCAAGGTCCGTTTAGTCT
CsWRKY22	GAACATGCAGCAGACTTGGA	TCTGGTTCCGTAAAGGATGG
CsWRKY41	CGCCATAGCTGAGAGAGCTT	TGATGTCAGTCGACCTGGAG
CsWRKY57	GCGTTCCATCAGAACACCTT	GCAGCATCACTGATCGAAGA
CsWRKY38	TTCTGTTGCCAGAACCTTCC	CAGGCGGTCTGAACTCAAAT
β-actin	ACAATTTCCCGCTCTGCTGTTGTG	AGCTCAAGCCCACCAGTAAC
